# Supplementary material for: A meta-analysis of the watch-and-wait strategy versus total mesorectal excision for rectal cancer exhibiting complete clinical response after neoadjuvant chemoradiotherapy
Source: PubMed Central journal article supplement (PMC8522111; doi:10.1186/s12957-021-02415-y), 2021-10-18
Supplement: 12957_2021_2415_MOESM1_ESM.pdf [file 12957_2021_2415_MOESM1_ESM.pdf]

<https://www.crd.york.ac.uk/prospero/#myprospero>  
<https://www.crd.york.ac.uk/prospero/#recordDetails>

ID: CRD42021244032

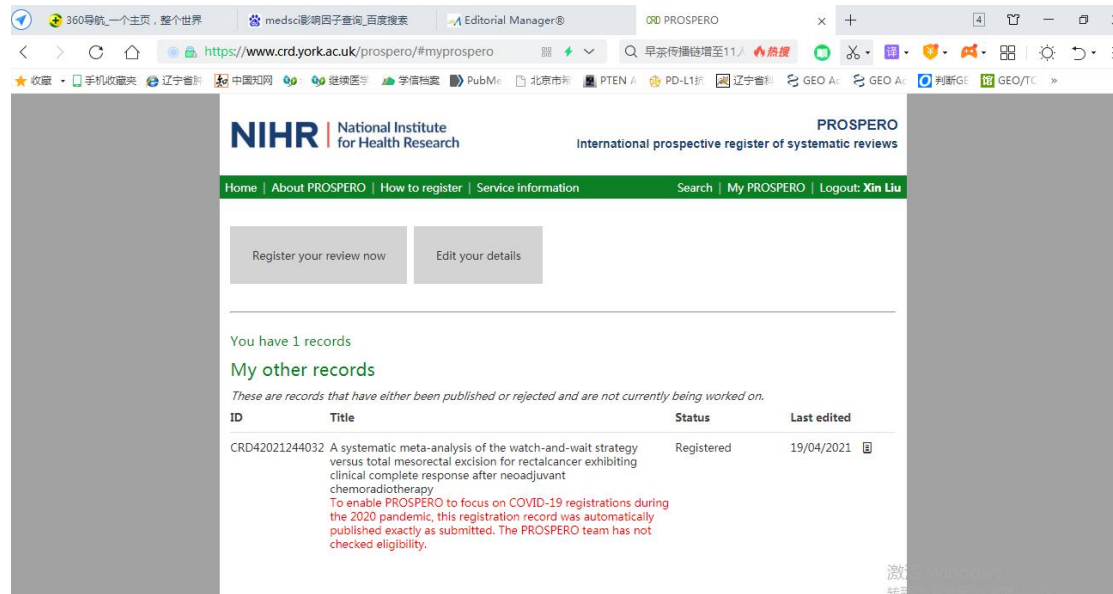

The screenshot shows the PROSPERO website interface. At the top, there is a navigation bar with the NIHR logo and the text "National Institute for Health Research" and "PROSPERO International prospective register of systematic reviews". Below this is a green navigation bar with links for "Home", "About PROSPERO", "How to register", "Service information", "Search", "My PROSPERO", and "Logout: Xin Liu".

Below the navigation bar, there are two buttons: "Register your review now" and "Edit your details".

The main content area shows "You have 1 records" and "My other records". Below this, there is a table with the following data:

| ID             | Title                                                                                                                                                                                                                                                                                                                                                                                                     | Status     | Last edited |
|----------------|-----------------------------------------------------------------------------------------------------------------------------------------------------------------------------------------------------------------------------------------------------------------------------------------------------------------------------------------------------------------------------------------------------------|------------|-------------|
| CRD42021244032 | A systematic meta-analysis of the watch-and-wait strategy versus total mesorectal excision for rectalcancer exhibiting clinical complete response after neoadjuvant chemoradiotherapy<br><i>To enable PROSPERO to focus on COVID-19 registrations during the 2020 pandemic, this registration record was automatically published exactly as submitted. The PROSPERO team has not checked eligibility.</i> | Registered | 19/04/2021  |
