# Supplementary material for: A meta-analysis of the watch-and-wait strategy versus total mesorectal excision for rectal cancer exhibiting complete clinical response after neoadjuvant chemoradiotherapy
Source: PubMed Central journal article supplement (PMC8522111; doi:10.1186/s12957-021-02415-y), 2021-10-18

2-DFS in the W&W group was better than that in the TME group

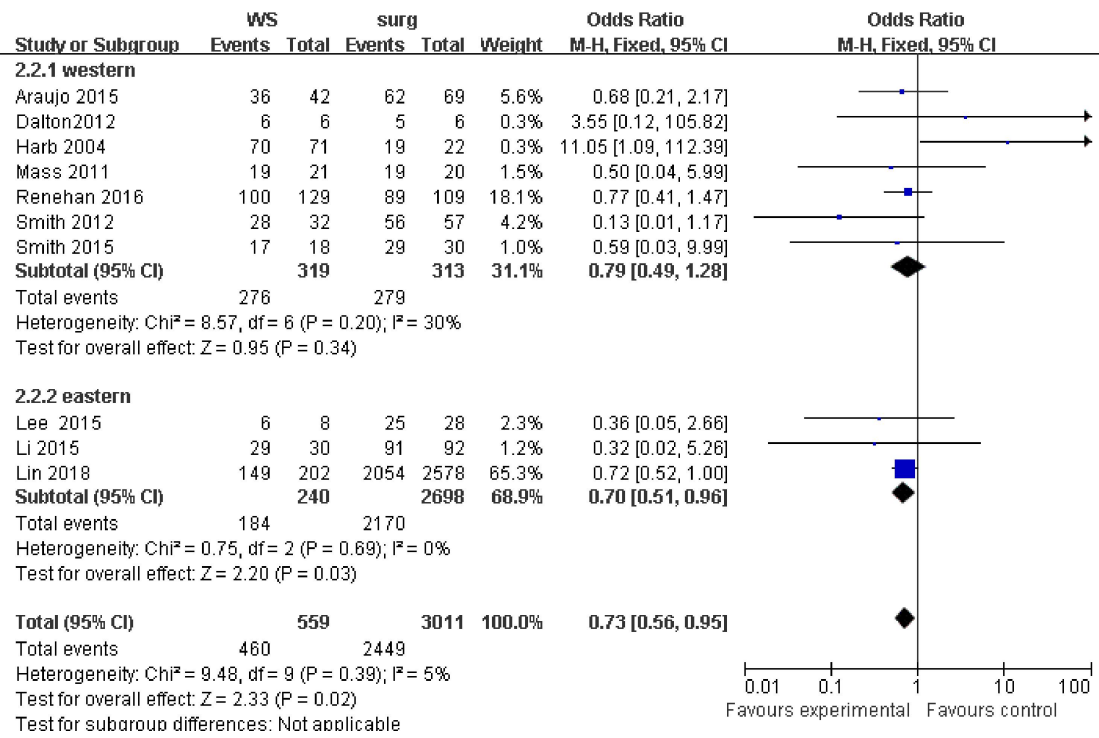

Supplement: 12957_2021_2415_MOESM14_ESM.pdf [file 12957_2021_2415_MOESM14_ESM.pdf]
