# Supplementary material for: A meta-analysis of the watch-and-wait strategy versus total mesorectal excision for rectal cancer exhibiting complete clinical response after neoadjuvant chemoradiotherapy
Source: PubMed Central journal article supplement (PMC8522111; doi:10.1186/s12957-021-02415-y), 2021-10-18
Supplement: 12957_2021_2415_MOESM15_ESM.pdf [file 12957_2021_2415_MOESM15_ESM.pdf]

This document certifies that the manuscript

**A meta-analysis of the watch-and-wait strategy versus total mesorectal excision for rectal cancer exhibiting complete clinical response after...**

was edited for proper English language, grammar, punctuation, spelling, and overall style by one or more of the highly qualified native English speaking editors at AJE.

This certificate was issued on **April 21, 2021** and may be verified on the [AJE website](#) using the verification code **9A1B-402D-72FD-53CA-D156**.

Neither the research content nor the authors' intentions were altered in any way during the editing process. Documents receiving this certification should be English-ready for publication; however, the author has the ability to accept or reject our suggestions and changes. To verify the final AJE edited version, please visit our verification page at [aje.com/certificate](#). If you have any questions or concerns about this edited document, please contact AJE at [support@aje.com](mailto:support@aje.com).

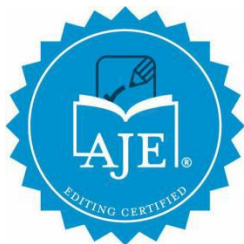

AJE provides a range of editing, translation, and manuscript services for researchers and publishers around the world.

For more information about our company, services, and partner discounts, please visit [aje.com](#).
